# Supplementary material for: A Novel CD48-Based Analysis of Sepsis-Induced Mouse Myeloid-Derived Suppressor Cell Compartments
Source: Hindawi journal article supplement (doi:10.1155/2017/7521701), 2017-01-01
Supplement: f1 [file 7521701.f1.pdf]

# Supplementary data

**a**

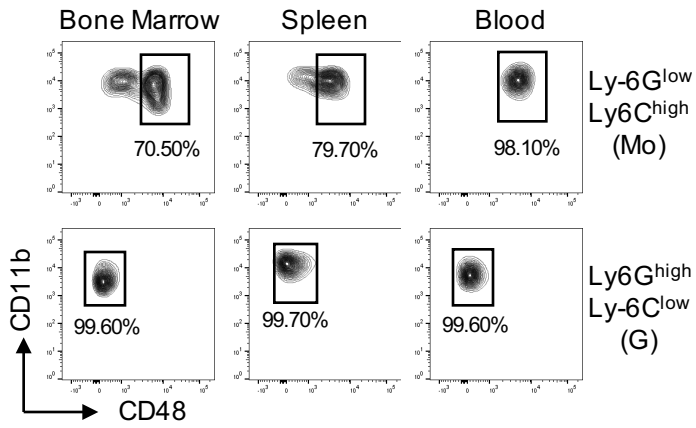

**b**

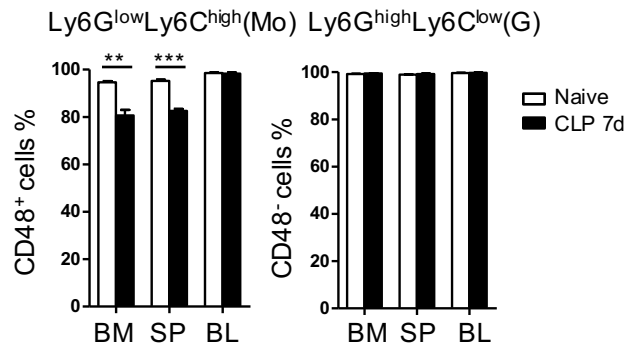

Jia et al

Supplementary figure 1
